1     Impacts of predator-mediated interactions along a climatic gradient  
2                     on the population dynamics of an alpine bird

3

4     Diana E. Bowler<sup>1-4</sup>, Mikkel A. J. Kvasnes<sup>4</sup>, Hans C. Pedersen<sup>4</sup>, Brett K. Sandercock<sup>4</sup>, Erlend B.  
5                                             Nilsen<sup>4</sup>

6

7     1. German Centre for Integrative Biodiversity Research (iDiv), Putschstr. 4, 04103 Leipzig,  
8     Germany

9     2. Institute of Biodiversity, Friedrich Schiller University Jena, Dornburger Straße 159, 07743  
10     Jena, Germany

11     3. Helmholtz Center for Environmental Research - UFZ, Department of Ecosystem Services,  
12     Permoserstraße 15, 04318 Leipzig, Germany

13     4. Norwegian Institute for Nature Research, P.O. 5685 Torgarden, 7485 Trondheim, Norway

14

15 **Abstract**

16 According to classic theory, species' population dynamics and distributions are less influenced by  
17 species interactions under harsh climatic conditions compared to under more benign climatic  
18 conditions. In alpine and boreal ecosystems in Fennoscandia, the cyclic dynamics of rodents strongly  
19 affect many other species, including ground-nesting birds such as ptarmigan. According to the  
20 'alternative prey hypothesis' (APH), the densities of ground-nesting birds and rodents are positively  
21 associated due to predator-prey dynamics and prey-switching. However, it remains unclear how the  
22 strength of these predator-mediated interactions change along a climatic harshness gradient in  
23 comparison with the effects of climatic variation. We built a hierarchical Bayesian model to estimate  
24 the sensitivity of ptarmigan populations to interannual variation in climate and rodent occurrence  
25 across Norway during 2007–2017. Ptarmigan abundance was positively linked with rodent  
26 occurrence, consistent with the APH. Moreover, we found that rodent dynamics had stronger effects  
27 on ptarmigan in colder regions. Our study highlights how species interactions play an important role  
28 for the population dynamics of species at higher latitudes and suggests that they can become even  
29 more important in the most climatically harsh regions.

30

31 **Keywords:** Boreal ecosystems; Climate change; Indirect interactions; Population cycles; Predator-  
32 prey interactions

## 33 Introduction

34 Climatic variability and species interactions are two key drivers influencing the spatial and temporal  
35 patterns in the distribution and abundance of organisms [1, 2]. An old hypothesis, originally proposed  
36 by Darwin, posits that climate is the main determinant of species' range limits in harsh abiotic  
37 regions whereas species interactions are a more important determinant under benign abiotic  
38 conditions (hereafter the 'classic hypothesis') [3]. Range limits are determined by local population  
39 growth rates; hence, this hypothesis also implies that population growth rates should be more  
40 sensitive to climate variability in climatically harsh regions but more sensitive to species interactions  
41 in more climatically benign regions. Previous studies have examined changes in demographic and  
42 population processes along elevational and latitudinal climatic gradients [4-7], but few studies have  
43 been able to tease apart the sensitivity of population growth to climate and species interactions over  
44 large spatial and temporal scales.

45 In the cold environments of alpine and boreal areas, vertebrate species co-exist in relatively  
46 simple food-webs but biotic interactions still exert strong impacts on species' population dynamics  
47 [8]. One particular characteristic of northern alpine and boreal ecosystems in Fennoscandia is the  
48 rodent population dynamics, which are characterized by large inter-annual cyclic fluctuations in  
49 abundance, with peak years coming at regular intervals [9, 10]. Similar cycles are seen with other  
50 species in other parts of the world e.g., the snowshoe hare (*Lepus americanus*) in the boreal  
51 ecosystems of North America [11]. Although the mechanisms are still contested, predator-prey  
52 interactions are generally regarded as the most parsimonious explanation underlying the cyclic  
53 dynamics of rodents [12, 13], especially due to specialist predators, such as mustelids [14].

54 The population dynamics of many species of alpine and boreal communities, including the  
55 avian community, often covary with the phase of the rodent cycle [15, 16]. One hypothesised reason  
56 for this covariation is that ground-nesting birds (such as ptarmigan and grouse, *Tetraonidae*) and  
57 rodents share a similar set of generalist predators, including the red fox (*Vulpes vulpes*) and corvids  
58 [17, 18]. Hagen [19] proposed the 'alternative-prey hypothesis' (APH), stating that ground-nesting  
59 birds are less vulnerable to predation in peak rodent years because generalist predators switch to  
60 feeding on rodents. By contrast, ground-nesting birds suffer greater predation in rodent  
61 decline/crash years because there are fewer prey options available to hunting predators. Other  
62 indirect interactions based on shared predators, such as apparent competition, are typically  
63 predicted to lead to negative correlations in the abundance of alternative prey species [20]. Here,  
64 predator-mediated interactions between rodents and ground-nesting birds are hypothesized to lead  
65 to a positive association, such that ground-nesting birds are more abundant in peak rodent years.

66 Similar indirect effects of rodent population dynamics have been examined in a range of ecosystems,  
67 and across a range of alternative prey species [16, 21, 22].

68 Previous studies have found partial support for the main predictions of the APH [16, 23];  
69 however, the APH also makes secondary predictions about how the relative importance of predator-  
70 mediated interactions should change along ecological gradients. In particular, Angelstam [15]  
71 predicted that interactions should be stronger in regions with fewer prey species because the  
72 predators become functionally more specialist, causing tighter linkages between predators and prey.  
73 By contrast, in regions where predators have access to a more diverse array of prey species,  
74 fluctuations in rodent populations should have weaker effects on the dynamics of predator  
75 populations. Indeed, the reduced amplitude of the rodent population cycle at lower latitudes is  
76 probably due to a stabilising effect of more generalist predators [24-26]. Climatic conditions,  
77 especially snow cover, has also been linked with characteristics of the rodent cycles, with more cyclic  
78 behaviour in regions with greater snow cover [16, 27, 28]. Based on these arguments, ground-nesting  
79 birds might be less affected by the rodent cycle in less climatically harsh areas, where there is a more  
80 diverse set of prey resources and weaker linkage between rodents and predators.

81 Alpine birds in Fennoscandia are reported to be declining in abundance over the last decades  
82 [29], but the underlying causes for the widespread declines remain poorly understood. Willow  
83 ptarmigan (*Lagopus lagopus*) are a resident species of montane habitats. Previous studies of  
84 population dynamics have shown that the abundance of willow ptarmigan typically fluctuate in  
85 synchrony with the small rodent dynamics [16, 30]. In addition, recruitment rates are affected by  
86 weather conditions during the breeding season [30]. Thus, ptarmigan are a good model species for  
87 testing alternative hypotheses about the relative importance of climate forcing and species  
88 interactions on population dynamics. In this study, we compared the sensitivity of the population  
89 dynamics of willow ptarmigan to temporal variability in both climate and rodent populations using a  
90 multi-year (2007–2017) dataset covering a large geographic gradient across Norway. We assumed no  
91 direct effect of rodents on ptarmigan but rather we expected their population dynamics to be linked  
92 due to prey-switching of shared predators as predicted by the APH. Therefore, we used the statistical  
93 relationship between rodent abundance and ptarmigan population dynamics as a signal of predator-  
94 mediated interactions (Fig. 1). Although we use the term “harsh” to describe the coldest climatic  
95 conditions within our study sites, we note that they are not necessarily harsh for the ptarmigan, a  
96 species well-adapted to cold conditions. We tested three key predictions that emerge based on the  
97 classic hypothesis about the relative importance of climate vs species interactions, and the  
98 alternative prey hypothesis (Fig. 1):

- 99           1) Under the classic hypothesis, we predicted that predator-mediated interactions, and hence  
100           rodent population dynamics, would more strongly affect ptarmigan in warmer regions. By  
101           contrast, under the APH, we predicted that predator-mediated interactions, and hence  
102           rodent population dynamics, would more strongly affect ptarmigan in colder regions, where  
103           there are fewer prey sources for predators and stronger trophic linkages between predators  
104           and their prey populations.
- 105           2) Under both hypotheses, we predicted that ptarmigan population growth would be more  
106           sensitive to inter-annual climatic variability in colder regions, because they are closer to the  
107           edge of their physiological (climate) and ecological (food availability) niche, which may  
108           render them more sensitive to climatic variability.
- 109           3) Last, we predicted that the standardized effect sizes of rodents on the population growth  
110           rate of ptarmigan would be generally greater than the effect of climate because ptarmigan  
111           are well-adapted for life in cold environments and predation is a major determinant of  
112           reproductive success.

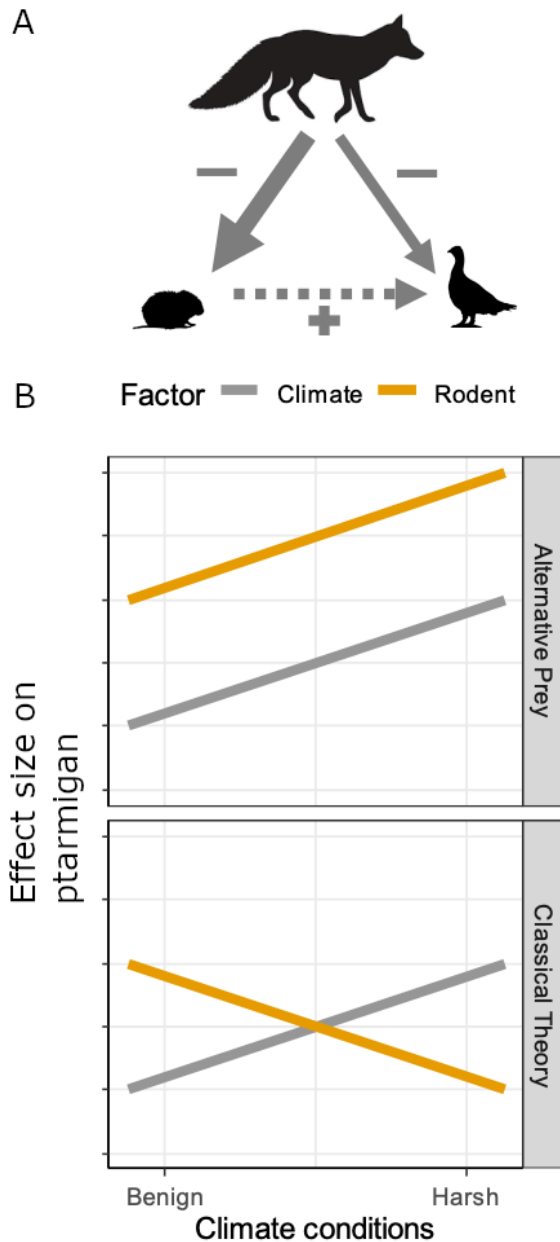

113

114 **Fig. 1** (A) The hypothesized direct (solid) and indirect (dashed) relationships between ptarmigan and  
115 rodents as alternative prey, and their generalist predators, such as the red fox. In peak rodent years,  
116 ptarmigan are mostly ignored by predators; by contrast, in crash rodent years, ptarmigan are more  
117 frequently depredated. Together, these processes lead to a positive effect of rodent abundance on  
118 ptarmigan abundance. (B) Predicted effects of interannual climatic variability (grey lines) and rodent  
119 abundance (orange lines) on ptarmigan population dynamics according to the classic hypothesis  
120 (bottom) versus the 'alternative prey hypothesis' (top).

121

## 122 Methods

### 123 Population abundance data

124 We used a dataset of line-transect surveys covering almost the full latitudinal extent of Norway for  
125 an 11-year period (2007–2017). The surveys come from a structured citizen science program, based  
126 on coordinated collection by local and regional initiatives. Volunteer surveyors were instructed to  
127 follow common field procedures for estimation of ptarmigan densities using distance-sampling  
128 methods [31]. At a national or regional scale, however, the program does not allow for a random  
129 selection of study sites, because site selection is focused on the alpine habitats used by ptarmigan  
130 and is contingent on landowners establishing surveys on private and public lands. During the surveys,  
131 a team of two persons followed pre-defined transect lines, using trained pointing dogs to search both  
132 sides of the transect line, usually during August. For each detection of a cluster of ptarmigan (a group  
133 or an individual), surveyors recorded the perpendicular distances of the ptarmigan from the transect,  
134 the number of birds, the GPS coordinates and the date and time of day. In addition, length (and  
135 geographical position) of the transect line is recorded, as well as some other auxiliary data [32]. Since  
136 2013, all data management, development of field procedures and planning of study design has been  
137 coordinated by the Hønsfuglportalen project (<http://honsfugl.nina.no>). Transects are spatially  
138 clustered into survey regions (median of 17 line-transects per survey region), reflecting data that are  
139 reported to the same survey coordination node. We used all data collected since 2007, when the  
140 monitoring was substantially expanded, until 2017. The total effort varied across the period, and not  
141 all study sites were surveyed each year. We subsetted our analysis to 708 line-transects that were  
142 visited in at least 6 years (a median of 10 years), each with a mean length of 3.7 km. We excluded  
143 observations made at distances greater than 200 m from the transect line, as well as detections by  
144 the surveyor, and not by the dog, at distances > 10 m away from the transect line because those  
145 observations were likely due to the surveyor flushing birds when moving towards the pointing dog  
146 which were observed only because the surveyor left the transect line.

147

### 148 Covariate data

149 *Rodent data:* During the line surveys, surveyors recorded whether rodents were observed along the  
150 transect as a binary variable (yes/no). The surveyors were not asked to distinguish among rodent  
151 species, but the five main species in the study area that show cyclic dynamics include: Norwegian  
152 lemming (*Lemmus lemmus*), tundra vole (*Microtus oeconomus*), field vole (*M. agrestis*), bank vole  
153 (*Myodes glareolus*) and the grey red-backed vole (*M. rufocanus*). Rodent occurrence is denoted by *R*  
154 in subsequent statistical models.

155 *Climatic data:* We obtained high-resolution climatic data from the Norwegian Meteorological  
156 institute (MET Norway: [www.met.no](http://www.met.no)). Data were based on an interpolation from local weather  
157 stations, with a spatial resolution of 1x1 km and are available on a daily basis. For each line-transect,  
158 we applied a buffer of 200 m and matched our transect locations with the climate data. With the  
159 compiled data, we characterised the spatio-temporal variation in climatic conditions during spring  
160 (prior to and at the start of the breeding period) and winter (marking the end of the breeding  
161 period). Specifically, we calculated:

- 162 1) Spring onset - first year day with a rolling 7-day mean snow depth of zero. We use the term  
163 'spring' loosely since snow cover did not completely disappear until summer in some regions.
- 164 2) Spring temperature - average daily mean temperature during March, April and May
- 165 3) Winter onset - first year day with a rolling 7-day mean snow depth above zero
- 166 4) Winter temperatures – average daily mean temperature during December, January and  
167 February

168 For each climatic variable, we calculated (1) the average climatic conditions for each transect  
169 between 2007 and 2017, which defined the spatial climatic gradient (denoted as *CS*) and (2) the  
170 difference between the climatic value of each year at each transect and the spatial variable of each  
171 transect, which defined the temporal variation (i.e., anomalies, denoted as *CT*). Hence, we  
172 considered the effects of different characterisations of the climatic harshness gradient.

173 *Harvesting data:* We also compiled available data on harvest bags on ptarmigan but this data was  
174 only available at a coarse scale of administrative units and not at the line-transect scale (see SOM A  
175 for further details – no effect of harvesting on ptarmigan was found in our subsequent analysis but  
176 the covariate was retained in our model regardless).

177

## 178 [Statistical analysis](#)

179

## 180 [Ptarmigan dynamics](#)

181 We modelled ptarmigan dynamics using a hierarchical Bayesian model that included two linked  
182 models: a model for the observation process along each transect line (i.e. the observation model)  
183 and a model that described the ecological dynamics including the effect of climate and rodents on  
184 ptarmigan density as the latent variable (i.e. the state model).

185 (1) *Observation model: Estimation of effective strip width of the ptarmigan line-transects*



186 We fitted a distance-sampling detection model to estimate the effective strip width of each transect  
187 [31]. The central assumption of distance-sampling theory is that the detection probability decreases  
188 with increasing distance from the line-transect. We modelled the perpendicular distances of  
189 observation events (one or more birds in a group) from the transect as a half-normal distribution. On  
190 the transect line, we assumed perfect detection – a common assumption in distance-sampling [31].  
191 We modelled sigma - the parameter of this half-normal distribution that reflects the rate of distance-  
192 decay of detections - to be dependent on group size (i.e. the number of birds in each observation).  
193 Mean group size was modelled with a Poisson mixed-effects model with line and survey region,  
194 interacting with year (as a factor). To allow for any spatial variation in sigma, we additionally  
195 included random effects for transect line (L, in equation below) and survey region (SR), allowing  
196 some differences in how detectability declines with distance due to landscape or habitat features.  
197 We also considered fixed effects of forest cover or precipitation during the survey but found no  
198 effects (95% credible intervals overlapped zero) and thus did not include these factors in the model.  
199 The final model for sigma was:

$$200 \quad \log(\sigma_{i,t}) = b_0 + b_{GS} \text{GroupSize}_{i,t} + L_i + SR_i$$

201 The effective strip width of each transect ( $i$ ) in each year ( $t$ ) was calculated from sigma based on the  
202 following equation:

$$203 \quad ESW_{i,t} = \sqrt{\frac{(\pi * \sigma_{i,t}^2)}{2}}$$

204

## 205 (2) State model: Testing the effect of climate and rodent on ptarmigan populations

206 We then used the estimated effective strip width (ESW) and data on transect length (TL) to relate  
207 the total number of individuals observed along each transect ( $N$ , as following a negative binomial  
208 distribution with constant dispersion parameter,  $r$ ) to the latent variable, ptarmigan density,  $D$ ,  
209 (abundance per km<sup>2</sup>) for each year  $t$  and each transect  $i$ :

$$210 \quad \text{Ptarmigan\_Obs}_{i,t} \sim \text{Negative Binomial}(N_{i,t}, r)$$

$$211 \quad N_{i,t} = D_{i,t} \times TL_{i,t} \times ESW_{i,t} \times 2$$

212 Ptarmigan density ( $D_{i,t}$ ) was modelled in two different ways. In a first model (“random-effects  
213 model”), we modelled the ptarmigan dynamics using a series of random effects that reflected the  
214 spatial and temporal structure of the data. The random terms included year (as a factor), transect

215 line, survey region and survey region-year. We used this model to make predictions of the realized  
216 ptarmigan dynamics, without explicitly specifying the underlying ecological covariates.

217 In a second set of models (“mixed-effects model”), we tested the additive effects of the two main  
218 ecological variables of interest: rodent occurrence and climate as well as the interaction between  
219 rodent occurrence and the spatial climatic variable. We tested the four climatic variables (winter  
220 temperature, winter onset, spring temperature, spring onset) in separate models.

221 Density in year 1 was modelled using spatial random effects among line-transects. Density in  
222 subsequent years were modelled as spatial ( $i$ ) and temporal ( $t$ ) variation in the population growth  
223 rate as:

$$224 \quad \ln D_{i,t} = \ln D_{i,t-1} + r_{i,t}$$

225 where the growth rate,  $r$ , was decomposed into:

$$226 \quad r_{i,t} = b_0 + b_A \ln D_{i,t-1} + L_i + SR_i + Year_t + b_{CS} CS_i + b_{CT} CT_{i,t} + b_R R_{i,t} + b_{RL} R_{i,t-1} + \\ 227 \quad b_h H_{i,t-1} + b_{int\_CT} CS_i CT_{i,t} + b_{int\_R} CS_i R_{i,t}$$

228

229 where  $b_A$  assumes a Gompertz form of density-dependence, an assumption made by previous  
230 ptarmigan studies [33, 34].  $L$  and  $SR$  were random effects to account for the spatial grouping of data  
231 into line-transects ( $L$ ) and survey region ( $SR$ ). A year (as a factor) random effect was included to  
232 account for any additional causes of temporal variability.

233  $CS$  and  $CT$  were covariates for the spatial gradient in climate and temporal anomalies for the climatic  
234 variable, respectively. Two coefficients ( $b_R$  and  $b_{RL}$ ) for rodents ( $R$ ) tested the effects of rodent  
235 occurrence immediately preceding the ptarmigan survey (during the same year,  $t$ ) and a lagged effect  
236 of rodent occurrence during the previous year ( $RL$ ,  $t-1$ ). We also accounted for the potential effect of  
237 harvesting ( $H$ ) on ptarmigan growth. All covariates were centered and scaled to units of 1 standard  
238 deviation prior to analysis.

239 The critical tests of the classic versus the alternative prey hypotheses were based on the interaction  
240 terms of our model. The interaction terms were: (1) between  $CS$  and  $CT$  to test whether the effect of  
241 annual climatic anomalies changed along the climate gradient or (2) between  $CS$  and  $R$  (of the same  
242 year) to test whether the effect of rodents changed along the climatic gradient.

243 In preliminary analyses, we explored additional random effects (a coarser spatial term) but they had  
244 little effect on our results so we retained the simpler model.

245

246 Table 1. Table of model parameters on ptarmigan density and their meanings.

| Term of model | Type   | Statistical meaning                                   |
|---------------|--------|-------------------------------------------------------|
| $b_0$         | Fixed  | Intercept                                             |
| $b_A$         | Fixed  | Density-dependence                                    |
| $b_{CS}$      | Fixed  | Spatial climatic variable                             |
| $b_{CT}$      | Fixed  | Temporal climatic anomalies                           |
| $b_R$         | Fixed  | Rodent occurrence (same year)                         |
| $b_{RL}$      | Fixed  | Lagged effect of rodent occurrence (previous year)    |
| $b_H$         | Fixed  | Harvesting during the previous hunting season         |
| $b_{int\_CT}$ | Fixed  | Interaction term between temporal and spatial climate |
| $b_{int\_R}$  | Fixed  | Interaction term between rodents and spatial climate  |
| $L$           | Random | Line-transect effect                                  |
| $SR$          | Random | Survey region effect                                  |
| $Year$        | Random | Year effect                                           |

247

## 248 Rodent dynamics

249 We included a submodel for rodent occurrence (presence/absence, modelled as a Bernoulli  
 250 distribution) within our hierarchical model for ptarmigan. This submodel was based on a series of  
 251 random intercept terms (for survey region [SR], year [Y], as a factor] and their interaction) to flexibly  
 252 predict the interannual variability in rodent dynamics. Hence, the rodent submodel was:

$$253 \quad \text{Rodent\_Occ}_{i,t} \sim \text{Bernoulli}(R_{i,t})$$

$$254 \quad \text{logit}(R_{i,t}) = b_0 + Y_t + SR_i + Y_t SR_i$$

255 Modelling rodent occurrence allowed us to impute missing data in the observed rodent dataset.  
 256 Additionally, the model predicted the probability of rodent occurrence at the level of the survey  
 257 region rather than at the transect-level, which mean meant smoothing over local reporting and  
 258 ecological variation. This choice was based on the assumptions that many predators (especially birds  
 259 of prey) forage over reasonable distances and are not likely affected by fine-scale transect-level  
 260 variation. We also considered a more complicated autoregressive model of order 2 for the rodent  
 261 dynamics, but similar cyclic dynamics were obtained, and similar effects on ptarmigan were found  
 262 (SOM B), so we proceeded with the simpler assumption-free random-effects model.

263 In further models, we also investigated how rodent dynamics changed along the climatic gradient. In  
 264 Bayesian mixed-effects models with binomial errors, we tested the effects of the spatial climatic

265 variables and temporal climatic anomalies variables on the probability of rodent occurrence. Line-  
266 transect and survey regions were also included as random intercepts. Each of the four types of  
267 climatic variables (winter temperature, winter onset, spring temperature, spring onset) were tested  
268 in separate models.

269 Models were fitted using JAGS within R version 3.6.0. We used three MCMC chains, ran for 50,000  
270 iterations, discarding the first 25,000 iterations as a burn-in period. We used uninformative or weakly  
271 informative priors for all parameters, but a narrower prior for the density-dependence term (a  
272 uniform prior between -2 and 0) to help convergence. We assessed model convergence using MCMC  
273 chain traceplots and the Gelman-Rubin R-hat statistic (all <1.1). To assess the fit of the model, we  
274 used the DHARMA package [35] that uses simulations from the fitted model to create scaled  
275 residuals, which were then checked against the expected distribution using a quantile-quantile plot  
276 and against the model predictions to check for any systematic deviations in fit. Covariate effects  
277 were inferred when the 95% credible intervals did not overlap zero. Code for the fitted model is  
278 available in the SOM C.

279

## 280 Results

### 281 *Data description*

282 The 708 line-transects (Fig. 2a) were clustered into 36 survey regions (Fig. 2b) distributed along a  
283 wide latitudinal and climatic gradient across Norway. The warmest regions were those nearest the  
284 coast and the coldest regions were inland and upland (Fig. 2b). Along each transect, a median of 2  
285 groups were observed (range = 0–18), with a median of 4 (1–35) individuals seen per group. As  
286 expected by distance-sampling theory, the frequency of observations declined with increasing  
287 distance from the line-transect (Fig. 3). The average effective strip width was 107 m (interquartile  
288 range = 100–114 m). Sigma of the half-normal distribution was positively affected by group size, with  
289 the estimated effective strip width being 95 m for the smallest group size and 126 m for the largest  
290 group size (Fig. 3).

291

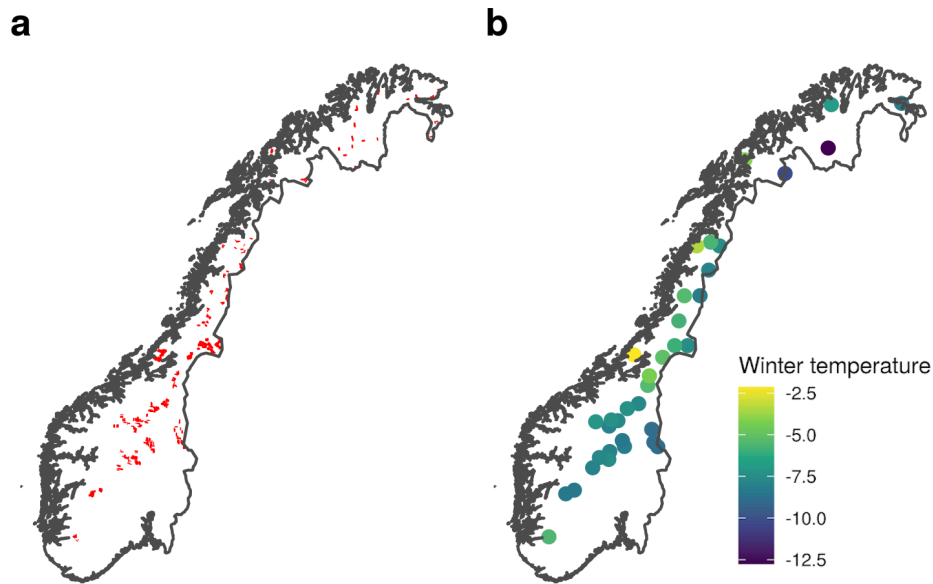

292

293 **Fig. 2** (a) Location of the 708 line-transects across Norway are shown by red lines. (b) The location of  
294 each of the 36 survey regions (a survey region is a cluster of neighbouring line-transects), coloured by  
295 their mean winter temperature during 2007–2017. Fig. S1 shows the same maps for the other  
296 climatic variables.

297

298

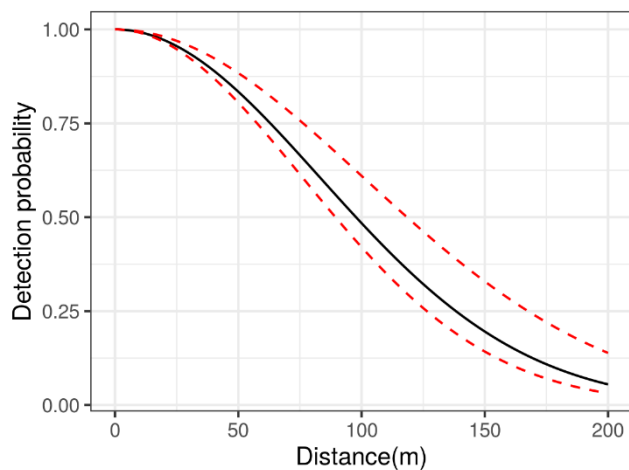

299

300 **Fig. 3.** Distance-dependent decay of ptarmigan detectability along the line-transects. The black line is  
301 the prediction for the median ptarmigan group size; the lower and upper dashed red lines are the  
302 predictions for the minimum and maximum ptarmigan group size.

303

304 *Climatic, rodent and ptarmigan population variation*

305 Climate and rodent occurrence both showed large and generally spatially synchronized fluctuations  
306 (Fig. 4, note: this figure shows the climatic gradient split into simplified quartiles, but climate was  
307 treated as a continuous variable in all analyses). Our 11-year dataset spanned c. 3 rodent cycles. The  
308 probability of rodent occurrence increased along the climatic harshness gradient, driven by higher  
309 occurrence probability in peak years within colder regions (Table S1). For instance, in the first peak  
310 rodent years, during 2010/2011, mean rodent occurrence across transects was 38% in the region of  
311 the warmest quartile (based on winter temperature) but 64% in the coldest. In the second peak  
312 rodent years, during 2014/2015, rodent occurrence was 18% in the warmest and 37% in the coldest.  
313

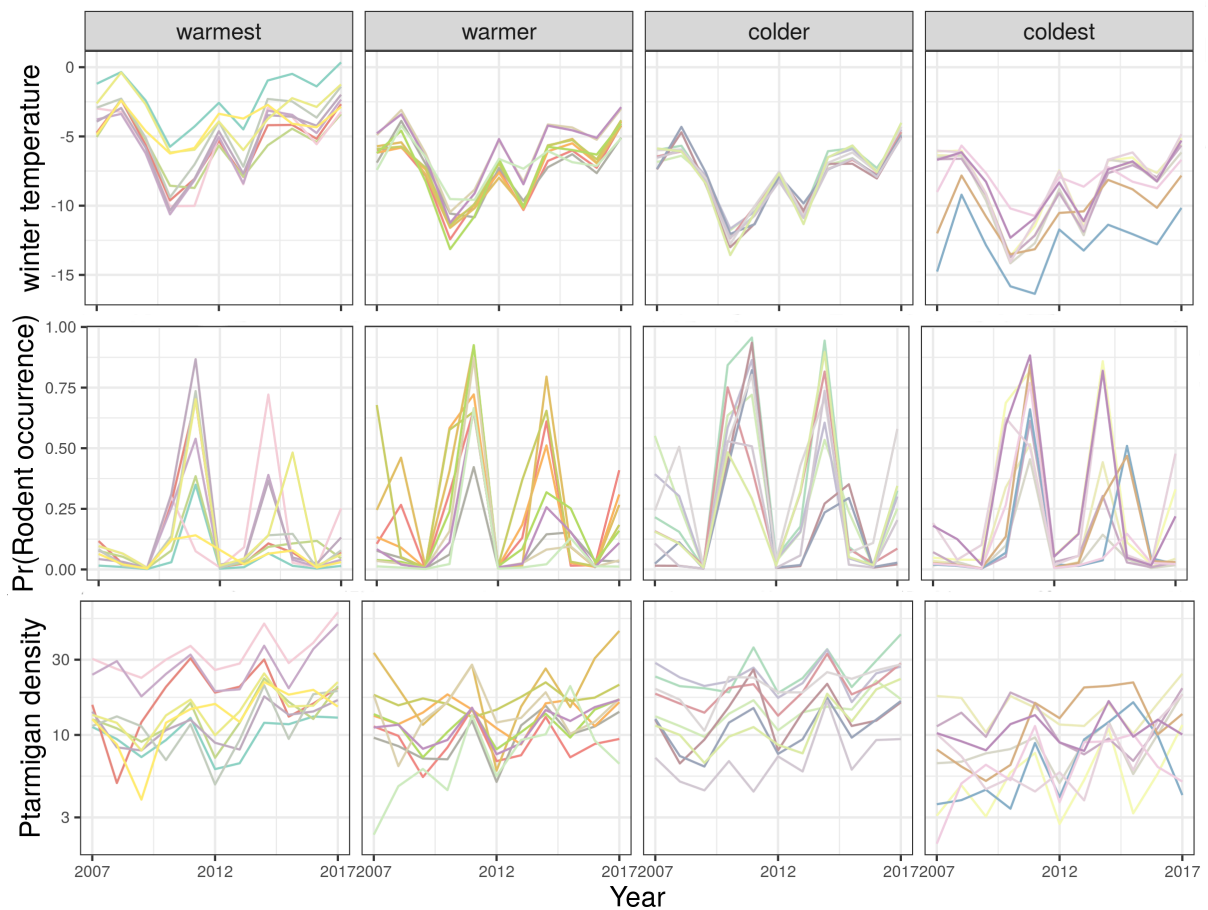

314

315 **Fig. 4** Time-series of winter temperature (°C), probabilities of rodent occurrence and willow  
316 ptarmigan densities in August (birds per km<sup>2</sup>) as predicted by the random-effects models. In our  
317 analysis, the spatial climatic gradient was treated as a continuous variable. Here, for presentation  
318 purposes we divided here the spatial climatic gradient into quartiles with equal numbers of transects  
319 within each. Lines shown are means for each of the 36 survey regions (averaged over the transects

320 within each). Fig. S2 shows the time-series for the other climatic variables and Fig. S3 shows the  
321 locations of each quartile.

322

### 323 *Mean effects of climatic and rodent fluctuations on ptarmigan populations*

324 Ptarmigan growth was higher in more climatically benign regions (positive spatial effects of climate  
325 shown in Fig. 5), described by warmer springs and winters, and later winters and earlier springs.

326 Similarly, temporally, ptarmigan growth increased in years with warmer spring temperatures but was  
327 less affected by the timing of seasonal onsets and winter temperatures (temporal effects of climate

328 shown in Fig. 5). Ptarmigan density was positively associated with rodent occurrence of the same

329 year, but negatively associated with rodent occurrence in the previous year (Fig. 5). Effects sizes of

330 rodents were larger than the effect sizes of the temporal variability in climate.

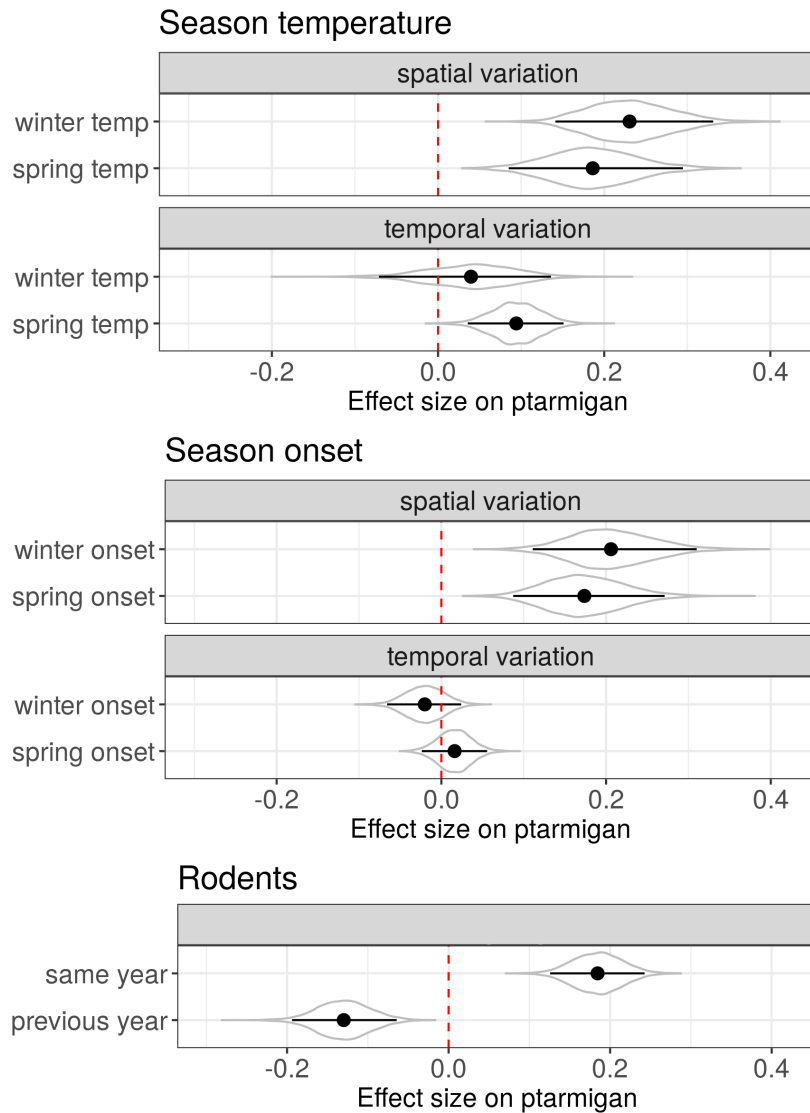

331

332 **Fig. 5** Effects of seasonal temperatures, seasonal onsets, and rodent occurrence on changes in  
333 ptarmigan population density. Climate variables are split into a spatial variable (mean values across  
334 years) and a temporal variable (annual anomalies around the mean spatial variation). Covariates  
335 were standardized to units of standard deviation to facilitate comparison of effect sizes. Violins  
336 represent the full posterior distributions. Point and ranges represent mean effects and 95% credible  
337 intervals of the distributions. The dashed vertical red line is the line of no effect. The sign of the  
338 effects of spring onset were flipped so that larger values represent lower climatic harshness (i.e.,  
339 earlier springs), consistent with the other climatic variables.

340

341 *Changes in the effects of climatic and rodent fluctuations along the climatic harshness gradient*

342 The statistical effects of rodent occurrence probability on ptarmigan densities were more positive in  
343 more climatically harsh areas compared with in more climatically benign areas (Fig. 6, left). In fact,  
344 the predicted effects of rodent occurrence were close to zero in regions with the warmest and  
345 earliest springs but strongly positive in the coldest regions with earliest winters and latest springs.  
346 The effects of temporal climatic variability also tended to become more positive along the climatic  
347 harshness gradient, when described in terms of spring temperature (Fig. 6, right) but the 95%  
348 credible intervals of the interaction terms overlapped zero (Fig. S4).



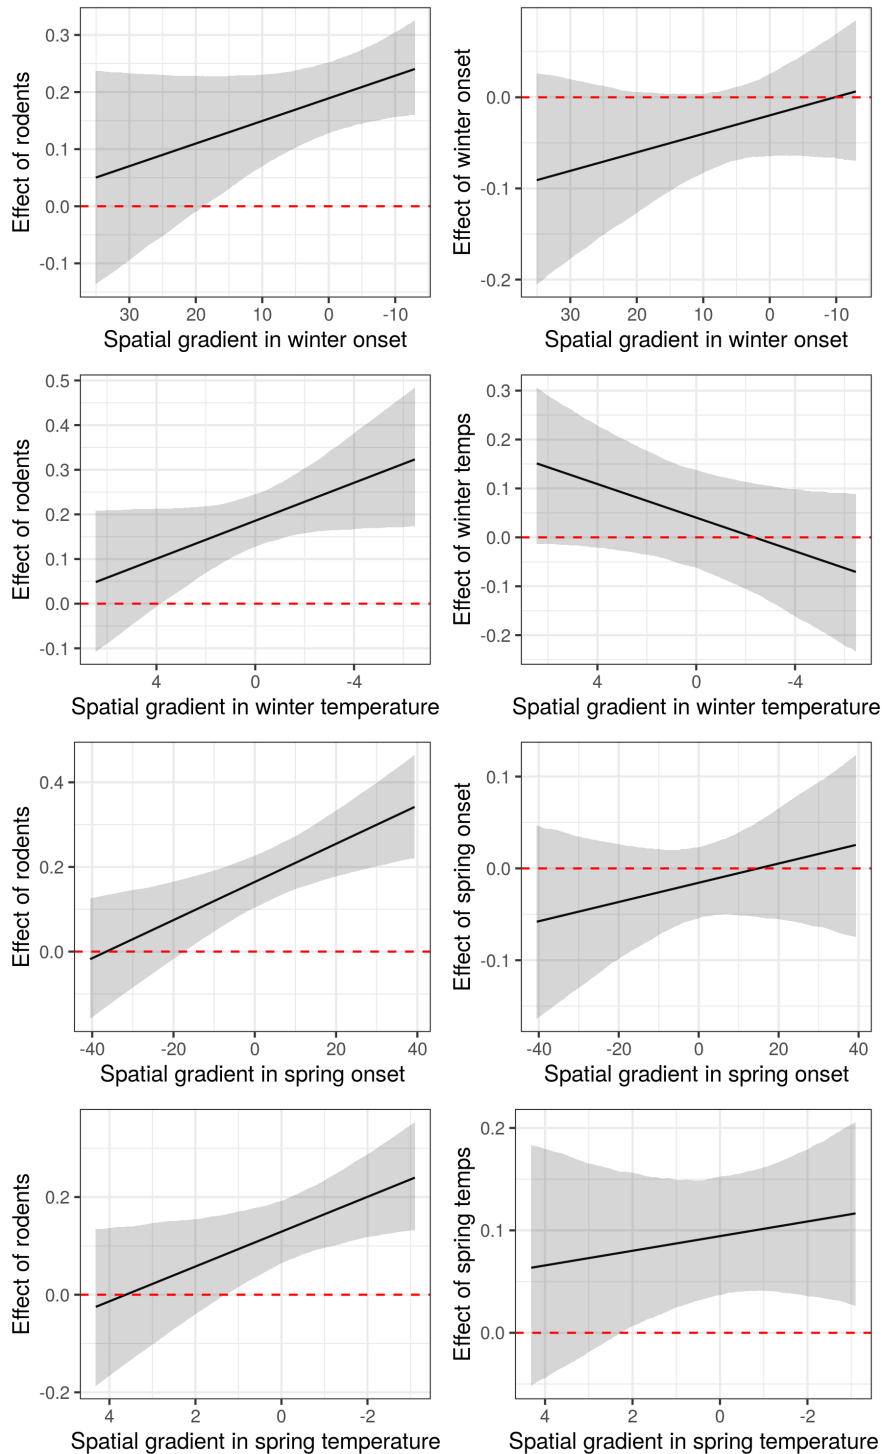

349

350 **Fig. 6** Changes in the effect sizes of temporal variability in climate and rodent occurrence and along  
 351 each climatic spatial gradient on ptarmigan density. X-axes are transformed so that left to right is an  
 352 increasing climatic harshness gradient (i.e., the values towards the right represent colder  
 353 temperatures, earlier winters and later spring). Shown are the mean standardized effect size and  
 354 95% credible interval. Each x-axis is centered around the median values for each variable (oC for  
 355 temperatures and days for onset). 95% credible intervals for the interaction terms are shown in Fig.  
 356 S4.

357

## 358 Discussion

359 Understanding how fluctuations in climatic conditions and species interactions affect species'  
360 population dynamics is central to current research in population ecology. We outlined two different  
361 hypotheses about how the strength of species interactions might vary along a climatic gradient, and  
362 tested our predictions using a large-scale dataset on the willow ptarmigan. Our results suggest that  
363 the impacts of predator-mediated interactions on willow ptarmigan increase along the climate  
364 gradient, indicated by more strongly positive signals of rodent dynamics in colder areas. Hence, our  
365 results were consistent with predictions stemming from the alternative prey hypothesis (APH) rather  
366 than the classical view of how species interactions change with increasing climatic harshness.

367 Our results support our main prediction based on the APH: a stronger link between rodent  
368 fluctuations and ptarmigan dynamics in colder regions. According to the APH, shared predators are  
369 expected to prey-switch towards rodents and away from ptarmigan, when rodents are more  
370 abundant [15, 19, 23]. Ptarmigan had higher growth rates during years with more rodents, which  
371 would be consistent with lower predation pressure. Hence, our results are consistent with the APH,  
372 previously tested over smaller-scales [23, 25, 36]. While the APH primarily considers the immediate  
373 functional response of predators, the contrasting negative lagged effects of rodents is consistent  
374 with a numerical response of predators due to greater prey density, leading to negative effects of  
375 rodents on ptarmigan in the subsequent year. The weaker effect of rodents, and hence predator-  
376 mediated interactions, on ptarmigan density in warmer regions could be caused by greater prey  
377 diversity and more generalist predators, weakening the trophic links among the dynamics of  
378 predators and prey species [8, 15].

379 Previous research has shown how the role of species interactions can increase or decrease in  
380 strength along an ecological gradient due to different biotic and abiotic processes [5, 37-39].  
381 Probably the most common reason for changing strengths of interactions over a geographic range is  
382 changes in community assemblages and the abundance of interacting partners [3, 40, 41]. Our results  
383 appear to be at odds with the classic prediction of stronger species interactions at the warmer end of  
384 a species range [3], but the prediction arises from the assumption that the abundance of interacting  
385 partners is greater in warmer regions. The assumption may hold in many scenarios, but in our case  
386 rodents showed greater peaks in occurrence in colder regions. Indeed, other studies have shown an  
387 increase in the amplitude of rodent dynamics from southern to northern Fennoscandia [8]. Hence,  
388 our results are consistent with species interactions being important in areas where potential  
389 interacting partners are more common, at least periodically.

390 Another factor likely to affect the changing importance of species interactions is whether the  
391 predators are specialist or generalist species. When interactions involve specialists, they can be  
392 important over the whole distributional range of an organism [42]. Although none of the interactions  
393 between ptarmigan, rodents and predators are intrinsically specialist, they may be regarded as  
394 functionally specialist in cold regions due to the relatively low number of species in the food web.  
395 Since interaction networks at high latitudes tend to be often more specialised [43], other type of  
396 indirect interactions may also become more important in more northerly regions.

397 We found weaker support for interannual climatic variability having a greater effect on  
398 ptarmigan populations in colder regions. Climatic effects may be direct and related to species'  
399 physiology, or more likely indirect and related to climate-caused changes in the availability of  
400 resources or suitable habitat. Harsh conditions may expose an organism to the edge of its niche  
401 space, hence climatic variation at the colder edge of a species' range should be more likely to affect  
402 its population growth [44]. However, the ptarmigan is a well-adapted alpine species able to inhabit  
403 regions with harsher climates than those in our study area (e.g., in Alaska and Siberia). Our study  
404 does not therefore address the geographic range limits of the ptarmigan. However, other studies  
405 have found clearer evidence that species' sensitivity to climate increases towards the range edge [45,  
406 46]. Further work might consider the non-linearity in the relationship between climatic conditions  
407 and ptarmigan density to examine in more depth the effects of climatic variation at the climatic  
408 extremes.

409 High-altitude or -latitude organisms are among those most strongly exposed to climate  
410 change [47]. Our findings help understand the main pathways through which climate change may  
411 affect the population dynamics of ptarmigan, including the direct effects of warming versus indirect  
412 effects mediated through predators [48, 49]. Ptarmigan benefit from warmer springs, hence, climate  
413 change, at least in the short-term, may have some positive effects [50]. However, our results suggest  
414 that changes in predation pressure mediated via rodents are likely to be more important. One  
415 predicted consequence of climate change is a dampening of rodent cycles [16, 51]. Dampening cycles  
416 could mean no or less frequent years of high rodent abundance, which offer temporal refuges from  
417 predation that yield 'boom' years with high ptarmigan productivity. Hence, a warming climate may  
418 lead to a more constant rate of predation pressure on ptarmigan, lowering mean population growth  
419 rates. However, dampening of the cycles might also reduce the long-term abundance of predators,  
420 lowering predation pressure on the ptarmigan [12]. In particular, more frequent years with low vole  
421 abundance is expected to directly affect predator reproduction in the spring [51].

422 Our analysis has several limitations. First, the rodent data was only collected as a binary  
423 presence/absence variable along each line-transect and hence may not reflect the full changes in the  
424 relative abundances of rodents among years. Moreover, our rodent data was collected in the  
425 autumn, but rodent abundance in spring and early summer is probably the key parameter that drives  
426 predation pressure on ptarmigan and other ground-nesting birds. However, no comparable spring  
427 data for rodents are available spanning the range of our study system. Usually, we could expect  
428 spring and autumn rodent densities of the same year to be correlated [16] but that might vary with  
429 climatic conditions [51]. Overall, the patterns in the proportion of rodents seen within our data  
430 showed the expected large-scale synchronised annual cycles or rodents reported elsewhere [52].  
431 Second, although we can reasonably infer the interaction between ptarmigan and rodents to be  
432 caused by shared predators, data on predators would also help better understand the links between  
433 predator abundance, prey preference, and alternative prey availability [23]. Last, our analysis only  
434 focused on changes in the strength of one specific type of species interaction. Willow ptarmigan may  
435 be involved in various other types of species interactions such as competition with other herbivorous  
436 species, including ungulates, which differ in their strength along the climate harshness gradient.  
437 Hence, cumulatively, species interactions could still be more important at the warmer edge of its  
438 distribution.

439 Our analyses suggest that predator-mediated interactions become even more important in  
440 the colder regions of boreal ecosystems, contrary to the classic view that species interactions are  
441 more important at the warmer edge of species' distributions. The role of predator-mediated  
442 interactions along a climatic gradient are more generally likely to depend on the diet breadth of  
443 predators and availability of different prey types. Rodent cycles – regarded as the heartbeat of boreal  
444 ecosystems - cause changes in prey availability that lead to predator-mediated interactions for  
445 alternative prey species. Long-term dampening of the rodent cycles that is predicted to arise due to  
446 climate change is likely to have widespread repercussions for the dynamics of many species in the  
447 boreal, especially ground-nesting birds such as the willow ptarmigan.

448

#### 449 *Acknowledgements*

450 We thank Eike Lena Neuschulz, Nigel Yoccoz, Jens Åström and anonymous referees for comments on  
451 an earlier version. The work was supported by the Research Council of Norway (grant no. 251112)  
452 and by base funding from the Norwegian Institute for Nature Research. We are also grateful to all of  
453 the participants and land owners involved in the line transect survey program coordinated by the  
454 Rypeforvalningsprosjektet (2006–2011) and Hønsefuglportalen (from 2013–), and to the Norwegian  
455 Environment Agency for providing base funding to the program.

456

457

458 *Data availability*

459 The ptarmigan dataset (for different geographic regions) is freely available via GBIF [53-55]. The  
460 subset used for the analysis of this paper, along with the rodent data, are available at Dryad (link  
461 here XXX).

462

463 *Competing interests*

464 The authors have no competing interested to declare.

465

466 *Author contributions*

467 EBN and HCP designed the line-transect sampling protocols and helped to develop and maintain the  
468 Hønsøfuglportalen system. DB developed the research questions, with contributions from EBN. DB  
469 conducted the statistical analyses. DB wrote the first draft of the manuscript and all coauthors  
470 helped to refine the hypotheses and develop the manuscript.

471

472 *References*

- 473 1. Pearson R.G., Dawson T.P. 2003 Predicting the impacts of climate change on the distribution  
474 of species: are bioclimate envelope models useful? *Glob Ecol Biogeogr* **12**(5), 361-371.  
475 (doi:10.1046/j.1466-822X.2003.00042.x).
- 476 2. Mutshinda C.M., O'Hara R.B., Woiwod I.P. 2011 A multispecies perspective on ecological  
477 impacts of climatic forcing. *J Anim Ecol* **80**(1), 101-107. (doi:10.1111/j.1365-2656.2010.01743.x).
- 478 3. Louthan A.M., Doak D.F., Angert A.L. 2015 Where and When do Species Interactions Set  
479 Range Limits? *Trends Ecol Evol* **30**(12), 780-792. (doi:10.1016/j.tree.2015.09.011).
- 480 4. Ettinger A.K., Ford K.R., HilleRisLambers J. 2011 Climate determines upper, but not lower,  
481 altitudinal range limits of Pacific Northwest conifers. *Ecology* **92**(6), 1323-1331. (doi:10.1890/10-  
482 1639.1).
- 483 5. Kozlov M.V., Stekolshchikov A.V., Soderman G., Labina E.S., Zverev V., Zvereva E.L. 2015 Sap-  
484 feeding insects on forest trees along latitudinal gradients in northern Europe: a climate-driven  
485 patterns. *Glob Change Biol* **21**(1), 106-116. (doi:10.1111/gcb.12682).
- 486 6. Lim J.Y., Fine P.V.A., Mittelbach G.G. 2015 Assessing the latitudinal gradient in herbivory.  
487 *Glob Ecol Biogeogr* **24**(10), 1106-1112. (doi:10.1111/geb.12336).
- 488 7. Roslin T., Hardwick B., Novotny V., Petry W.K., Andrew N.R., Asmus A., Barrio I.C., Basset Y.,  
489 Boesing A.L., Bonebrake T.C., et al. 2017 Higher predation risk for insect prey at low latitudes and  
490 elevations. *Science* **356**(6339), 742-744. (doi:10.1126/science.aaj1631).
- 491 8. Hanski I., Henttonen H., Korpimäki E., Oksanen L., Turchin P. 2001 Small-rodent dynamics and  
492 predation. *Ecology* **82**(6), 1505-1520. (doi:10.1890/0012-9658(2001)082[1505:srdap]2.0.co;2).
- 493 9. Krebs C.J. 1996 Population cycles revisited. *J Mammal* **77**(1), 8-24. (doi:10.2307/1382705).
- 494 10. Elton C. 1942 *Voles, Mice and Lemmings - Problems in Population Dynamics*. Oxford,  
495 Clarendon press.
- 496 11. Krebs C.J. 2011 Of lemmings and snowshoe hares: the ecology of northern Canada.  
497 *Proceedings of the Royal Society B-Biological Sciences* **278**(1705), 481-489.  
498 (doi:10.1098/rspb.2010.1992).

- 499 12. Ims R.A., Fuglei E. 2005 Trophic interaction cycles in tundra ecosystems and the impact of  
500 climate change. *Bioscience* **55**(4), 311-322. (doi:10.1641/0006-3568(2005)055[0311:ticite]2.0.co;2).
- 501 13. Myers J.H. 2018 Population cycles: generalities, exceptions and remaining mysteries.  
502 *Proceedings of the Royal Society B-Biological Sciences* **285**(1875). (doi:10.1098/rspb.2017.2841).
- 503 14. Hanski I., Hansson L., Henttonen H. 1991 Specialist predators, generalist predators, and the  
504 microtine rodent cycle. *J Anim Ecol* **60**(1), 353-367. (doi:10.2307/5465).
- 505 15. Angelstam P., Lindstrom E., Widen P. 1984 Role of predation in short-term population  
506 fluctuations of some birds and mammals in Fennoscandia. *Oecologia (Berlin)* **62**(2), 199-208.  
507 (doi:10.1007/bf00379014).
- 508 16. Kausrud K.L., Mysterud A., Steen H., Vik J.O., Ostbye E., Cazelles B., Framstad E., Eikeset A.M.,  
509 Mysterud I., Solhoy T., et al. 2008 Linking climate change to lemming cycles. *Nature* **456**(7218), 93-  
510 U93. (doi:10.1038/nature07442).
- 511 17. Moss R., Watson A. 2001 Population cycles in birds of the grouse family (Tetraonidae). In  
512 *Advances in Ecological Research, Vol 32* (ed. Caswell H.), pp. 53-111.
- 513 18. Valkama J., Korpimäki E., Arroyo B., Beja P., Bretagnolle V., Bro E., Kenward R., Manosa S.,  
514 Redpath S.M., Thirgood S., et al. 2005 Birds of prey as limiting factors of gamebird populations in  
515 Europe: a review. *Biological Reviews* **80**(2), 171-203. (doi:10.1017/s146479310400658x).
- 516 19. Hagen Y. 1952 *Rovfuglene og viltpleien*. Oslo, Gyldendal Norsk forlag.
- 517 20. Holt R.D., Grover J., Tilman D. 1994 Simple rules for interspecific dominance in systems with  
518 exploitative and apparent competition. *Am Nat* **144**(5), 741-771. (doi:10.1086/285705).
- 519 21. McKinnon L., Berteaux D., Bety J. 2014 Predator-mediated interactions between lemmings  
520 and shorebirds: A test of the alternative prey hypothesis. *Auk* **131**(4), 619-628. (doi:10.1642/auk-13-  
521 154.1).
- 522 22. Zarybnicka M., Riegert J., Kouba M. 2015 Indirect food web interactions affect predation of  
523 Tengmalm's Owls *Aegolius funereus* nests by Pine Martens *Martes martes* according to the  
524 alternative prey hypothesis. *Ibis* **157**(3), 459-467. (doi:10.1111/ibi.12265).
- 525 23. Breisjøberget J.I., Odden M., Wegge P., Zimmermann B., Andreassen H. 2018 The alternative  
526 prey hypothesis revisited: Still valid for willow ptarmigan population dynamics. *Plos One* **13**(6).  
527 (doi:10.1371/journal.pone.0197289).
- 528 24. Bjørnstad O.N., Falck W., Stenseth N.C. 1995 Geographic gradient in small rodent density-  
529 fluctuations – a statistical modeling approach. *Proceedings of the Royal Society B-Biological Sciences*  
530 **262**(1364), 127-133. (doi:10.1098/rspb.1995.0186).
- 531 25. Kurki S., Helle P., Linden H., Nikula A. 1997 Breeding success of black grouse and capercaillie  
532 in relation to mammalian predator densities on two spatial scales. *Oikos* **79**(2), 301-310.  
533 (doi:10.2307/3546014).
- 534 26. Linden H. 1988 Latitudinal gradients in predator-prey interactions, cyclicality and synchronism  
535 in voles and small game populations in Finland. *Oikos* **52**(3), 341-349. (doi:10.2307/3565208).
- 536 27. Hansson L., Henttonen H. 1985 Gradients in density variation of small rodents – the  
537 important of latitude and snow cover. *Oecologia* **67**(3), 394-402. (doi:10.1007/bf00384946).
- 538 28. Ims R.A., Yoccoz N.G., Killengreen S.T. 2011 Determinants of lemming outbreaks. *Proc Natl*  
539 *Acad Sci U S A* **108**(5), 1970-1974. (doi:10.1073/pnas.1012714108).
- 540 29. Lehikoinen A., Green M., Husby M., Kalas J.A., Lindstrom A. 2014 Common montane birds are  
541 declining in northern Europe. *J Avian Biol* **45**(1), 3-14. (doi:10.1111/j.1600-048X.2013.00177.x).
- 542 30. Kvasnes M.A.J., Pedersen H.C., Storaas T., Nilssen E.B. 2014 Large-scale climate variability and  
543 rodent abundance modulates recruitment rates in Willow Ptarmigan (*Lagopus lagopus*). *Journal of*  
544 *Ornithology* **155**(4), 891-903. (doi:10.1007/s10336-014-1072-6).
- 545 31. Buckland S.T., Anderson D.R., Burnham K.P., Laake J.L., Borchers D.L., Thomas L. 2001  
546 *Introduction to distance sampling: estimating abundance of biological populations*. London, Oxford  
547 University Press.
- 548 32. Nilssen E.B., Vang R., Asbjørnsen E. 2018 Tetraonid line transect surveys from Norway: Data  
549 from Finnmarkseiendommen (FeFo). Version 1.2. . (ed. dataset N.I.f.N.R.S.e.).

- 550 33. Aanes S., Engen S., Saether B.E., Willebrand T., Marcstrom V. 2002 Sustainable harvesting  
551 strategies of Willow Ptarmigan in a fluctuating environment. *Ecol Appl* **12**(1), 281-290.  
552 (doi:10.1890/1051-0761(2002)012[0281:shsowp]2.0.co;2).
- 553 34. Pedersen H.C., Steen H., Kastdalen L., Broseth H., Ims R.A., Svendsen W., Yoccoz N.G. 2004  
554 Weak compensation of harvest despite strong density-dependent growth in willow ptarmigan.  
555 *Proceedings of the Royal Society B-Biological Sciences* **271**(1537), 381-385.  
556 (doi:10.1098/rspb.2003.2599).
- 557 35. Hartig F. 2020 DHARMA: Residual Diagnostics for Hierarchical (Multi-Level / Mixed)  
558 Regression Models. R package version 0.3.2.0. <https://CRAN.R-project.org/package=DHARMA>. (
- 559 36. Francksen R.M., Whittingham M.J., Ludwig S.C., Roos S., Baines D. 2017 Numerical and  
560 functional responses of Common Buzzards *Buteo buteo* to prey abundance on a Scottish grouse  
561 moor. *Ibis* **159**(3), 541-553. (doi:10.1111/ibi.12471).
- 562 37. Didion M., Kupferschmid A.D., Wolf A., Bugmann H. 2011 Ungulate herbivory modifies the  
563 effects of climate change on mountain forests. *Clim Change* **109**(3-4), 647-669. (doi:10.1007/s10584-  
564 011-0054-4).
- 565 38. Fussmann K.E., Schwarzmuller F., Brose U., Jousset A., Rall B.C. 2014 Ecological stability in  
566 response to warming. *Nature Climate Change* **4**(3), 206-210. (doi:10.1038/nclimate2134).
- 567 39. Vucic-Pestic O., Ehnes R.B., Rall B.C., Brose U. 2011 Warming up the system: higher predator  
568 feeding rates but lower energetic efficiencies. *Glob Change Biol* **17**(3), 1301-1310.  
569 (doi:10.1111/j.1365-2486.2010.02329.x).
- 570 40. Vazquez D.P., Poulin R., Krasnov B.R., Shenbrot G.I. 2005 Species abundance and the  
571 distribution of specialization in host-parasite interaction networks. *J Anim Ecol* **74**(5), 946-955.  
572 (doi:10.1111/j.1365-2656.2005.00992.x).
- 573 41. Fort H., Vazquez D.P., Lan B.L. 2016 Abundance and generalisation in mutualistic networks:  
574 solving the chicken-and-egg dilemma. *Ecol Lett* **19**(1), 4-11. (doi:10.1111/ele.12535).
- 575 42. Neuschulz E.L., Merges D., Bollmann K., Gugerli F., Bohning-Gaese K. 2018 Biotic interactions  
576 and seed deposition rather than abiotic factors determine recruitment at elevational range limits of  
577 an alpine tree. *Journal of Ecology* **106**(3), 948-959. (doi:10.1111/1365-2745.12818).
- 578 43. Dalsgaard B., Schleuning M., Maruyama P.K., Dehling D.M., Sonne J., Vizentin-Bugoni J.,  
579 Zanata T.B., Fjeldsa J., Bohning-Gaese K., Rahbek C. 2017 Opposed latitudinal patterns of network-  
580 derived and dietary specialization in avian plant-frugivore interaction systems. *Ecography* **40**(12),  
581 1395-1401. (doi:10.1111/ecog.02604).
- 582 44. Oedekoven C.S., Elston D.A., Harrison P.J., Brewer M.J., Buckland S.T., Johnston A., Foster S.,  
583 Pearce-Higgins J.W. 2017 Attributing changes in the distribution of species abundance to weather  
584 variables using the example of British breeding birds. *Methods Ecol Evol* **8**(12), 1690-1702.  
585 (doi:10.1111/2041-210x.12811).
- 586 45. Mills S.C., Oliver T.H., Bradbury R.B., Gregory R.D., Brereton T., Kuhn E., Kuussaari M.,  
587 Musche M., Roy D.B., Schmucki R., et al. 2017 European butterfly populations vary in sensitivity to  
588 weather across their geographical ranges. *Glob Ecol Biogeogr* **26**(12), 1374-1385.  
589 (doi:10.1111/geb.12659).
- 590 46. Myers-Smith I.H., Elmendorf S.C., Beck P.S.A., Wilmsking M., Hallinger M., Blok D., Tape K.D.,  
591 Rayback S.A., Macias-Fauria M., Forbes B.C., et al. 2015 Climate sensitivity of shrub growth across the  
592 tundra biome. *Nature Climate Change* **5**(9), 887-+. (doi:10.1038/nclimate2697).
- 593 47. Burrows M.T., Schoeman D.S., Buckley L.B., Moore P., Poloczanska E.S., Brander K.M., Brown  
594 C., Bruno J.F., Duarte C.M., Halpern B.S., et al. 2011 The Pace of Shifting Climate in Marine and  
595 Terrestrial Ecosystems. *Science* **334**(6056), 652-655. (doi:10.1126/science.1210288).
- 596 48. Cahill A.E., Aiello-Lammens M.E., Fisher-Reid M.C., Hua X., Karanewsky C.J., Ryu H.Y., Sbeglia  
597 G.C., Spagnolo F., Waldron J.B., Warsi O., et al. 2013 How does climate change cause extinction?  
598 *Proceedings of the Royal Society B-Biological Sciences* **280**(1750). (doi:10.1098/rspb.2012.1890).
- 599 49. Cahill A.E., Aiello-Lammens M.E., Fisher-Reid M.C., Hua X., Karanewsky C.J., Ryu H.Y., Sbeglia  
600 G.C., Spagnolo F., Waldron J.B., Wiens J.J. 2014 Causes of warm-edge range limits: systematic review,

- 601 proximate factors and implications for climate change. *J Biogeogr* **41**(3), 429-442.  
602 (doi:10.1111/jbi.12231).
- 603 50. Wegge P., Rolstad J. 2017 Climate change and bird reproduction: warmer springs benefit  
604 breeding success in boreal forest grouse. *Proceedings of the Royal Society B-Biological Sciences*  
605 **284**(1866). (doi:10.1098/rspb.2017.1528).
- 606 51. Cornulier T., Yoccoz N.G., Bretagnolle V., Brommer J.E., Butet A., Ecke F., Elston D.A.,  
607 Framstad E., Henttonen H., Hornfeldt B., et al. 2013 Europe-Wide Dampening of Population Cycles in  
608 Keystone Herbivores. *Science* **340**(6128), 63-66. (doi:10.1126/science.1228992).
- 609 52. Framstad E. 2017 Ground vegetation, epiphytes, small mammals and birds. Summary of  
610 results In *Terrestrial Ecosystems Monitoring in 2016* (NINA Report 1376).
- 611 53. Nilsen E.B., Vang R., Asbjørnsen E. 2020 Tetraonid line transect surveys from Norway: Data  
612 from Finnmarkseiendommen (FeFo). Version 1.5. Norwegian Institute for Nature Research. Sampling  
613 event dataset <https://doi.org/10.15468/s7c8qd>
- 614 54. Nilsen E.B., Vang R., Breisjøberget J.I. 2002 Tetraonid line transect surveys from Norway:  
615 Data from Statskog. Version 1.6. Norwegian Institute for Nature Research. Sampling event dataset  
616 <https://doi.org/10.15468/q2ehlk>.
- 617 55. Nilsen E.B., Vang R., Kjønsberg M., Kvasnes M.A.J. 2020 Tetraonid line transect surveys from  
618 Norway: Data from Fjellstyrene. Version 1.3. Norwegian Institute for Nature Research. Sampling  
619 event dataset <https://doi.org/10.15468/975ski>.
